# Supplementary material
Source: MDPI journal article supplement (https://www.mdpi.com/2075-163X/6/3/71)
Supplement: s1 [file s1]

# Supplementary Materials: Enhancement of Biofilm Formation on Pyrite by *Sulfobacillus thermosulfidooxidans*

Qian Li, Wolfgang Sand and Ruiyong Zhang

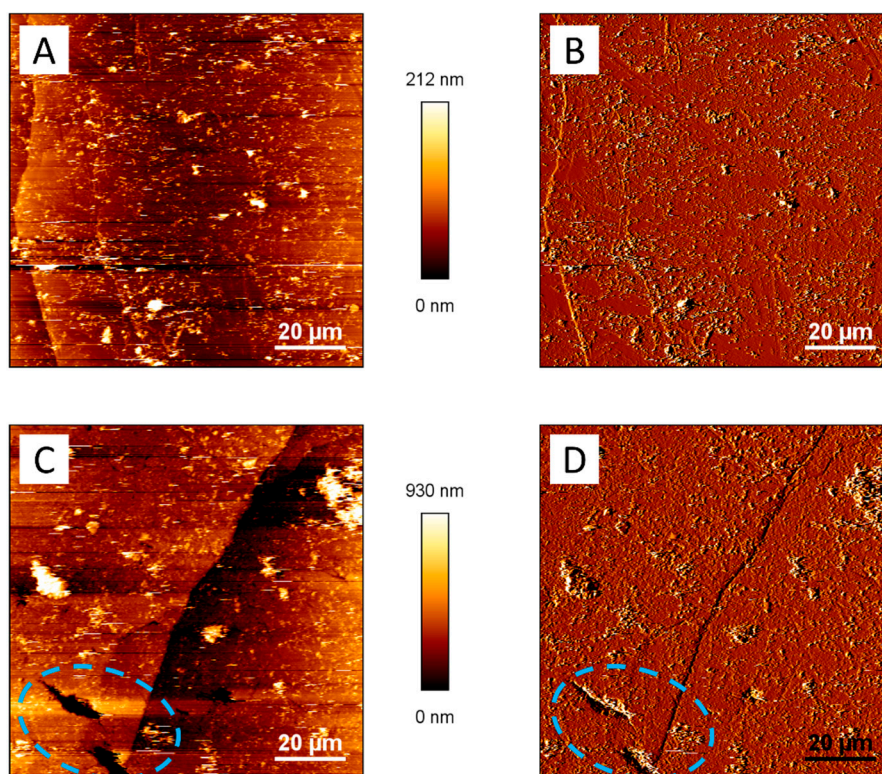

**Figure S1.** AFM images of pyrite surface. (A,B) are the height and vertical deflection images of clean pyrite surface, respectively; (C,D) are the representative height and vertical deflection images of pyrite surface after abiotic leaching for 10 months, respectively. Circles in (C,D) indicate etch pitches.

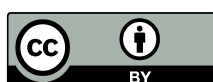

© 2016 by the authors; licensee MDPI, Basel, Switzerland. This article is an open access article distributed under the terms and conditions of the Creative Commons by Attribution (CC-BY) license (<http://creativecommons.org/licenses/by/4.0/>).
